# Supplementary material for: Raman spectroscopy and laser-induced degradation of groutellite and ramsdellite, two cathode materials of technological interest
Source: Royal Society of Chemistry journal article supplement (doi:10.1039/c9ra08662e), 2020-01-01
Supplement: c9ra08662e1.pdf [file c9ra08662e1.pdf]

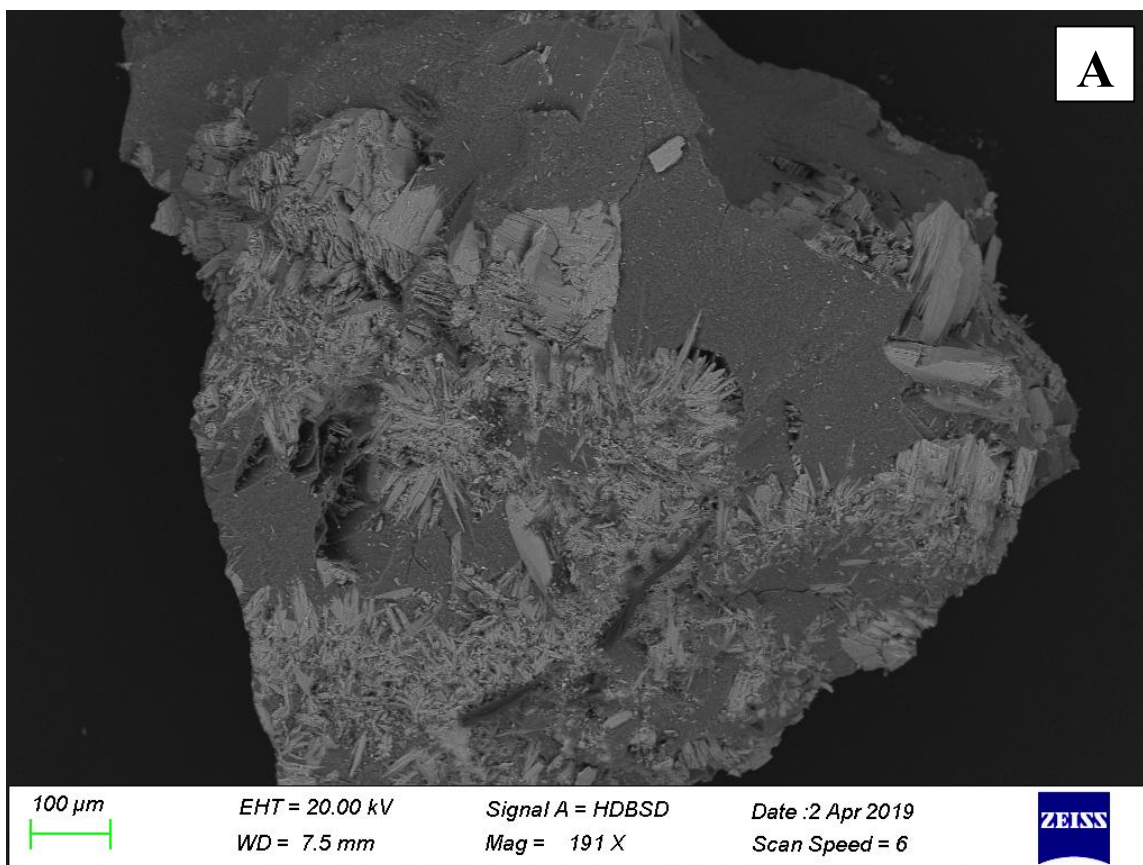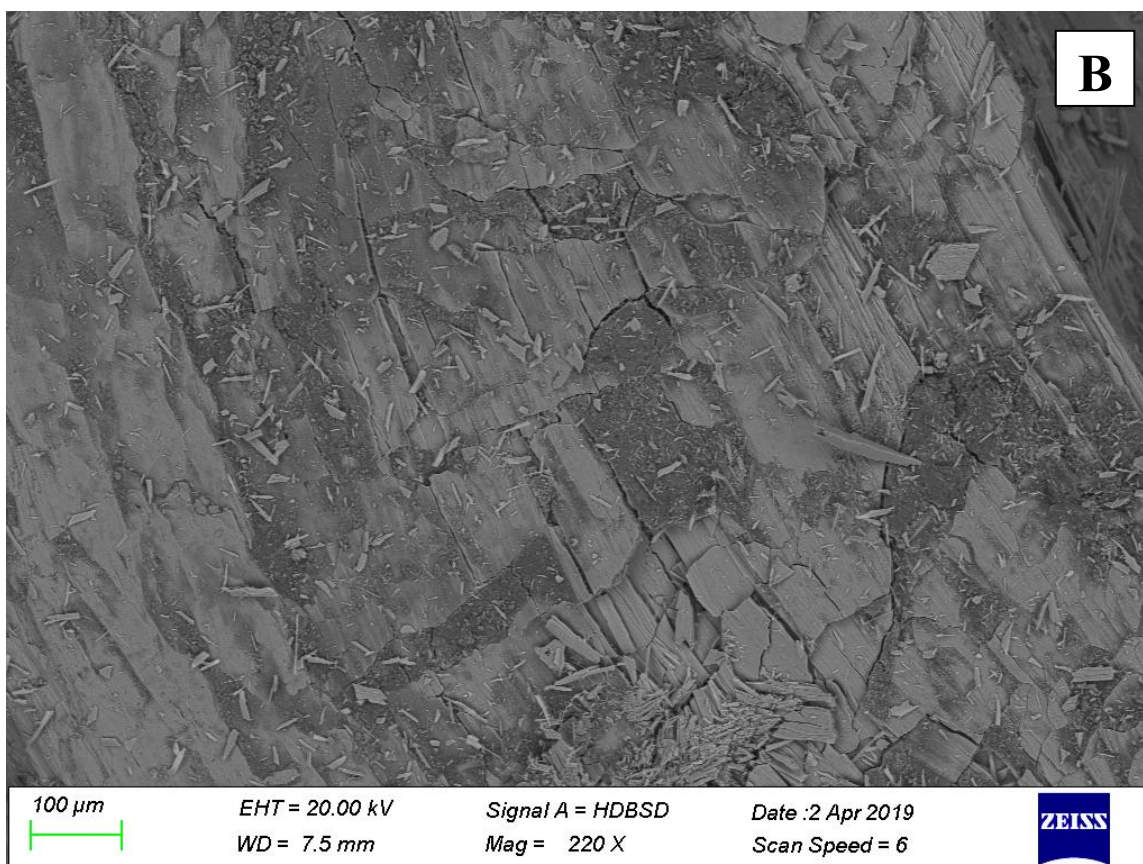

Figure S1. SEM images of sample G5502 (A) and sample G5695 (B)

# G5502

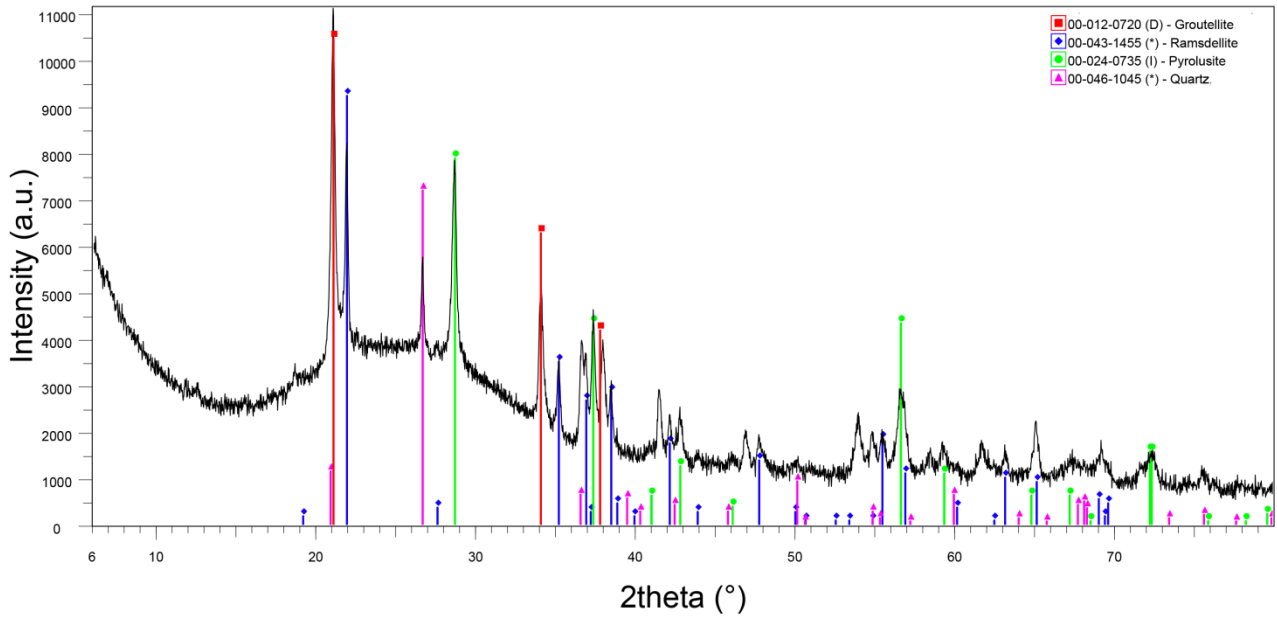

# G5695

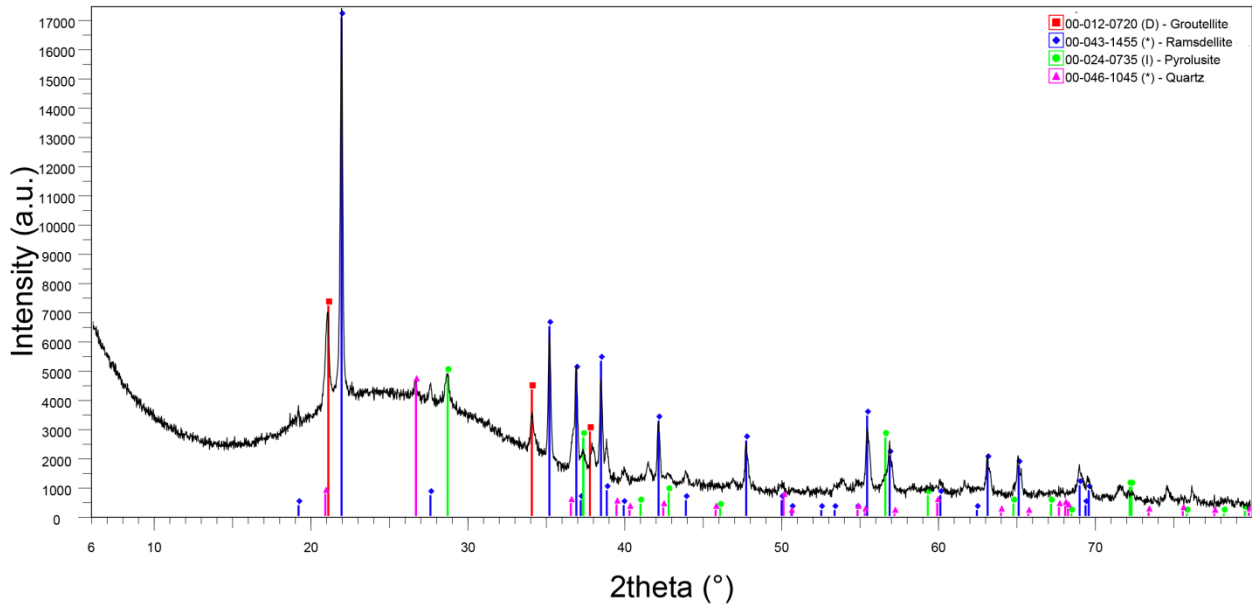

## G5502 600K

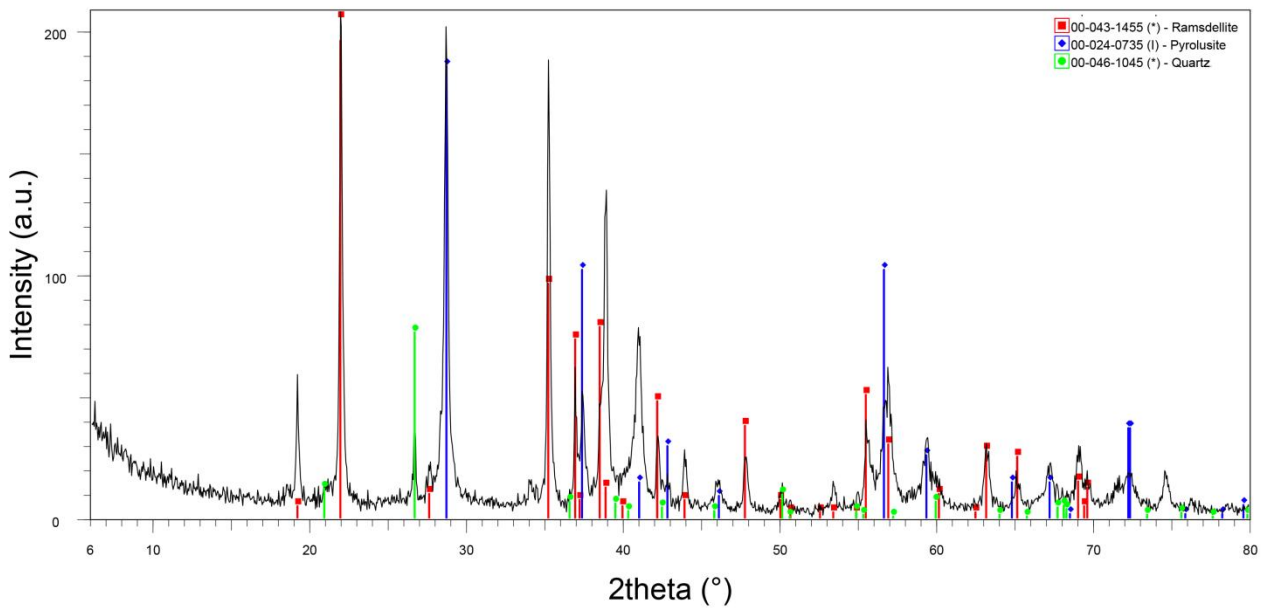

## G5502 673K

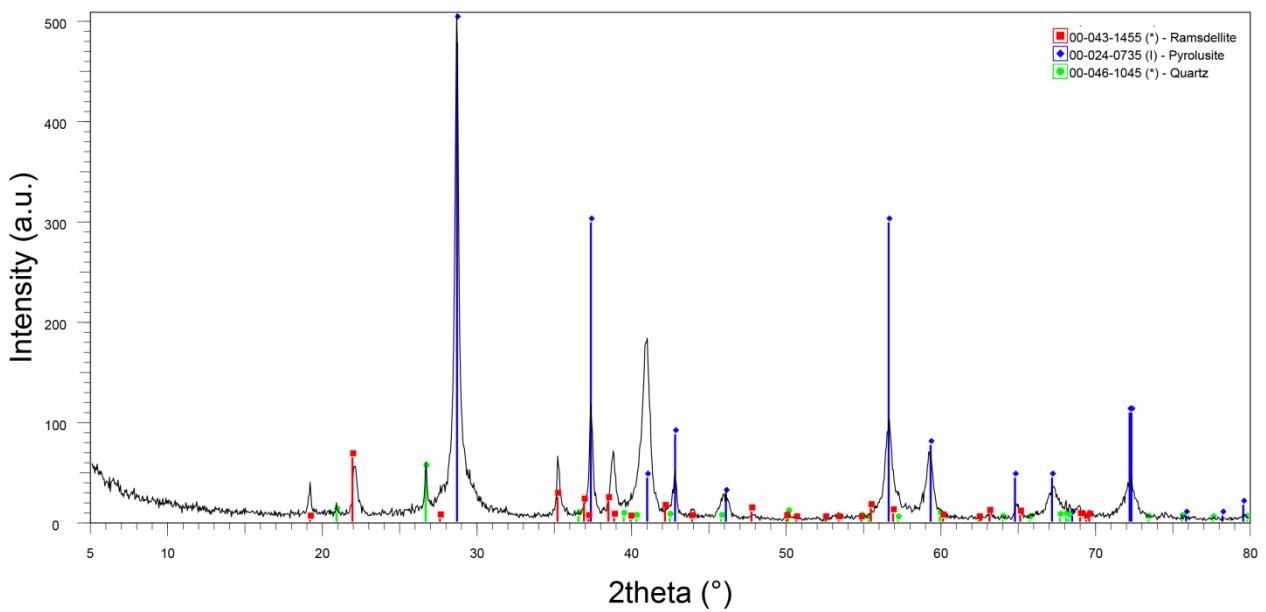

Figure S2 XRPD data of the investigated samples. Vertical colored bars identify the reflections of the various phases as listed by the relevant PDF.

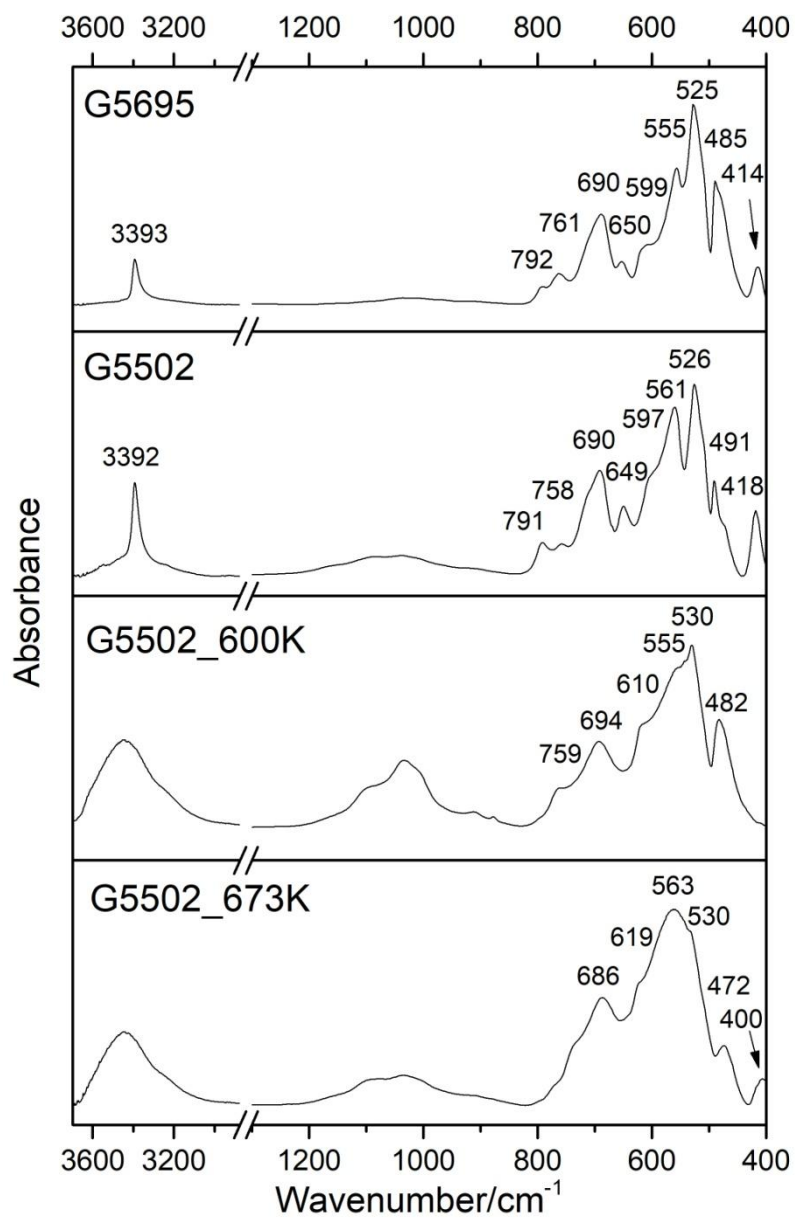

Figure S3 FT-IR spectra of the investigated samples

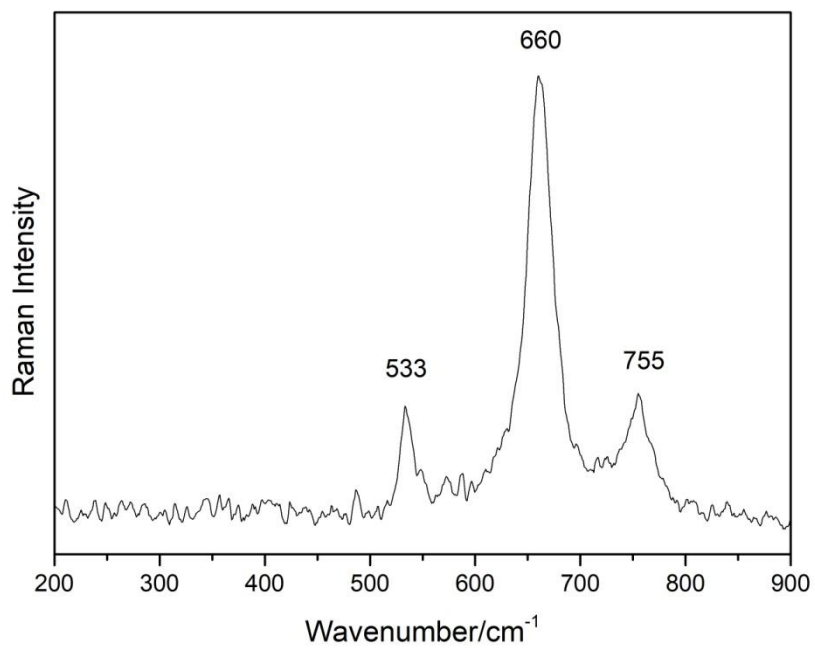

Figure S4 Raman spectra of pyrolusite collected on sample G5502. Spectra collected at  $\lambda = 532$  nm, laser power 1.15 mW
